# Supplementary material for: Inconsistent response of soil bacterial and fungal communities in aggregates to litter decomposition during short-term incubation
Source: PeerJ. 2019 Nov 13;7:e8078. doi: 10.7717/peerj.8078 (PMC6858812; doi:10.7717/peerj.8078)
Supplement: Data S1 [file peerj-07-8078-s001.xlsx]

## Sheet: Sheet1
Relative abundance
Bacteria	CK																Leaf																Stem
Phylum	2-4mm	2-4mm	2-4mm		1-2mm	1-2mm	1-2mm		0.25-1mm	0.25-1mm	0.25-1mm		<0.25mm	<0.25mm	<0.25mm		2-4mm	2-4mm	2-4mm		1-2mm	1-2mm	1-2mm		0.25-1mm	0.25-1mm	0.25-1mm		<0.25mm	<0.25mm	<0.25mm		2-4mm	2-4mm	2-4mm		1-2mm	1-2mm	1-2mm		0.25-1mm	0.25-1mm	0.25-1mm		<0.25mm	<0.25mm	<0.25mm
Proteobacteria	0.390784	0.399757	0.421704		0.408737	0.443976	0.44101		0.486102	0.431221	0.448317		0.324406	0.351876	0.389362		0.381247	0.435465	0.417772		0.434654	0.490032	0.399549		0.492685	0.456423	0.502546		0.407622	0.433036	0.421084		0.397095	0.458915	0.394919		0.479428	0.507788	0.45323		0.505244	0.499395	0.512972		0.415155	0.418311	0.401842
Acidobacteria	0.186579	0.228373	0.221923		0.2122	0.202473	0.196932		0.167091	0.186956	0.183857		0.282775	0.25361	0.257849		0.192209	0.196005	0.178945		0.172775	0.149344	0.187691		0.140684	0.145535	0.133702		0.212272	0.185797	0.199394		0.209525	0.176573	0.211391		0.160187	0.151414	0.160797		0.149128	0.14938	0.115995		0.189909	0.198649	0.220683
Gemmatimonadetes	0.109142	0.0925806	0.0863814		0.0898918	0.0848022	0.0851205		0.0929673	0.0943471	0.101444		0.116315	0.110491	0.105616		0.0868259	0.0930964	0.0812062		0.0922352	0.0863195	0.0832769		0.0856217	0.0982689	0.080327		0.107682	0.101988	0.0964462		0.0888082	0.0824312	0.09022		0.0825264	0.0706453	0.0871739		0.0850046	0.090942	0.094311		0.0995303	0.0989579	0.0992961
Bacteroidetes	0.0684353	0.0604835	0.0580396		0.0680882	0.0628159	0.0637714		0.0564366	0.0574856	0.062619		0.069429	0.063821	0.059274		0.0862118	0.0879005	0.116887		0.103914	0.0919974	0.0937812		0.106558	0.098127	0.104321		0.093298	0.108142	0.107952		0.0969297	0.0961233	0.0983989		0.0883653	0.0940083	0.0887492		0.0982901	0.0918221	0.0843207		0.0957022	0.0966895	0.0791518
Actinobacteria	0.118144	0.0847269	0.0762782		0.0779479	0.0658485	0.066434		0.0596709	0.0810285	0.0613492		0.0769432	0.0827887	0.0639634		0.107557	0.0650649	0.0806502		0.0671992	0.0512428	0.0949412		0.0506971	0.0749511	0.0495913		0.0498446	0.0531338	0.0607968		0.084863	0.06055	0.0766673		0.0557408	0.0528449	0.0821264		0.0519022	0.050815	0.0585475		0.0522583	0.047654	0.0604154
Chloroflexi	0.0414127	0.0456081	0.0436371		0.047022	0.046721	0.0507509		0.0390306	0.0524452	0.0454921		0.0388809	0.042016	0.029564		0.0586585	0.0406242	0.0468824		0.0421313	0.0355183	0.0492025		0.039478	0.0510815	0.0390191		0.0440244	0.0422166	0.0360956		0.0421591	0.0371129	0.0471665		0.0370914	0.0326923	0.0430967		0.0349776	0.0369678	0.0448089		0.0410152	0.0405758	0.0445468
Verrucomicrobia	0.0239014	0.0189021	0.0196938		0.0227335	0.01878	0.0211056		0.0178747	0.0155517	0.0163968		0.0164364	0.01892	0.0192604		0.0206483	0.0139827	0.0193613		0.0212015	0.0223645	0.0206702		0.0150214	0.0136848	0.015399		0.0169532	0.0153841	0.0165578		0.0190327	0.0230932	0.0151759		0.021505	0.0190242	0.0181646		0.0119664	0.0161734	0.0139554		0.0228881	0.0182838	0.0170157
Planctomycetes	0.011384	0.0174046	0.0136418		0.016513	0.0157948	0.0193685		0.0187653	0.0186461	0.0189524		0.0185646	0.0180911	0.0197147		0.0108719	0.0197246	0.0124933		0.0178783	0.0197148	0.0179797		0.0163044	0.0130069	0.0151966		0.0188721	0.0169304	0.016988		0.0122318	0.0156084	0.0126702		0.0211381	0.0197076	0.0171197		0.0128564	0.0164249	0.0177346		0.0233224	0.0217291	0.0206657
Nitrospirae	0.0196797	0.0202166	0.0139394		0.0165611	0.0154157	0.0164461		0.0172654	0.0196829	0.0182698		0.0193668	0.0187287	0.0187412		0.0152041	0.0109876	0.0104328		0.00856367	0.00832755	0.00821653		0.0107653	0.00852936	0.00913974		0.0163823	0.0112765	0.0118725		0.0140971	0.0136757	0.0162475		0.0135124	0.0127781	0.0124259		0.0126339	0.0147745	0.0145439		0.0190279	0.0209104	0.0215
Saccharibacteria	0.00266119	0.00361071	0.0191481		0.00559519	0.00803955	0.00563357		0.0114529	0.0110537	0.010746		0.00460022	0.00883037	0.00572782		0.00451475	0.00585782	0.00549442		0.00445758	0.00785439	0.00613823		0.00749503	0.00685817	0.00971584		0.00523344	0.00565386	0.00503586		0.00447342	0.005847	0.00397126		0.00572723	0.00632549	0.00630134		0.0087881	0.0041966	0.00498738		0.00829956	0.00515086	0.00444947
Others	0.0278768	0.0283366	0.0256135		0.0347094	0.035333	0.033428		0.0333432	0.031582	0.0325556		0.0322834	0.0308266	0.030927		0.0360516	0.0312914	0.0298759		0.0349896	0.0372847	0.0385532		0.0346899	0.0335341	0.0410432		0.0278165	0.026442	0.0277769		0.0307857	0.0300703	0.0331726		0.0347782	0.0327718	0.0308155		0.0292089	0.029109	0.0378235		0.0328926	0.0330883	0.0304336
Fungi	CK																Leaf																Stem
Phylum	2-4mm	2-4mm	2-4mm		1-2mm	1-2mm	1-2mm		0.25-1mm	0.25-1mm	0.25-1mm		<0.25mm	<0.25mm	<0.25mm		2-4mm	2-4mm	2-4mm		1-2mm	1-2mm	1-2mm		0.25-1mm	0.25-1mm	0.25-1mm		<0.25mm	<0.25mm	<0.25mm		2-4mm	2-4mm	2-4mm		1-2mm	1-2mm	1-2mm		0.25-1mm	0.25-1mm	0.25-1mm		<0.25mm	<0.25mm	<0.25mm
Ascomycota	0.482356	0.267172	0.238031		0.178564	0.12082	0.151945		0.149599	0.195011	0.0968611		0.239299	0.303543	0.242393		0.675657	0.421592	0.578458		0.396281	0.136065	0.333929		0.312138	0.455271	0.436009		0.338166	0.442574	0.454154		0.710837	0.411369	0.599424		0.352389	0.279319	0.468786		0.4509	0.581456	0.639047		0.570677	0.69198	0.667464
Aphelidiomycota	0.0530963	0.00379671	0.0463527		0.406954	0.388165	0.43394		0.272137	0.244442	0.490401		0.111729	0.0436484	0.0515277		0.160644	0.457884	0.291679		0.434047	0.508931	0.433095		0.370313	0.389806	0.401302		0.387697	0.34925	0.39981		0.0741962	0.275318	0.115049		0.440103	0.329897	0.249202		0.33914	0.242358	0.192761		0.225294	0.159356	0.1678
Chytridiomycota	0.0136768	0.0667969	0.143095		0.128442	0.106291	0.0436848		0.052752	0.112632	0.0068669		0.00635184	0.00705476	0.0813495		0.0345545	0.0108746	0.00836641		0.0165823	0.151644	0.0251166		0.0410171	0.00501014	0.0025922		0.00836291	0.00284664	0.00969646		0.0321953	0.113263	0.0240922		0.010989	0.173669	0.076514		0.0109551	0.00481272	0.0106467		0.0162561	0.0181808	0.00106526
Olpidiomycota	0.0141988	0.0104606	0.000549761		0.00327748	0.00780831	0.0051161		0.00991826	0.0138859	0.0104263		0.0102774	0.0163564	0.00116168		0.000486891	0.000189251	0.00080916		0.0017653	0.001206	0.000227594		0.00183309	0.00181002	0.00313945		0.0108632	0.00622255	0.000402224		0.000297141	0.00113573	0.00106203		0.00600058	0.00316109	0.00236517		0.00178441	0.00117742	0.00128168		0.0080837	0.00487063	0.0068877
Mortierellomycota	0.0151533	0.00387548	0.00320432		0.00284934	0.000834476	0.00173582		0.00224212	0.0140503	0.00897737		0.00721979	0.00906591	0.00463081		0.0251855	0.000975368	0.00748092		0.00348719	0.00273833	0.00455188		0.0022437	0.0019693	0.00100808		0.00227034	0.00133034	0.00172382		0.00148571	0.00780259	0.00128026		0.00144592	0.00131844	0.0042332		0.00078982	0.00183972	0.00154384		0.00294087	0.00114087	0.00204296
Basidiomycota	0.00287853	0.00746739	0.000298442		0.00134347	0.00141563	0.0013247		0.00277151	0.00327018	0.00444143		0.00501045	0.00538927	0.00428071		0.000280331	0.00557561	0.00294656		0.000622196	5.67529e-05	0.00185327		0.00451673	0.00127425	0.000345627		0.00127886	0.0024318	0.00225533		0.000460569	0.000162247	0.000581937		0.000957924	0.00447953	0.00112986		0.0286383	0.00295828	0.00704923		0.00166994	0.0320613	0.000933925
Mucoromycota	0	0.000504128	0		0	0	1.52265e-05		0.000264694	1.6433e-05	3.14995e-05		5.91786e-05	0.000424228	1.59134e-05		0.000737713	0.000422174	3.05344e-05		0.000245985	0	0.000520215		0.000205306	0.000130321	0.000100808		0.000143693	7.15236e-05	8.61908e-05		1.48571e-05	0.000648987	0.000203678		0.000144592	3.17697e-05	0.00103947		1.46263e-05	2.94356e-05	0		2.95565e-05	0	0.000116741
Glomeromycota	0.000149147	0.000645913	0.000424102		0.000664354	0.000208619	3.0453e-05		0.000171273	0.000345094	7.87488e-05		0.000493155	0.00226255	0.000986633		0	1.45577e-05	0		4.34091e-05	1.41882e-05	0.000162567		0	0	0		2.87385e-05	4.29142e-05	1.43651e-05		0	1.47497e-05	4.36453e-05		0	0	1.50648e-05		0	2.94356e-05	2.9129e-05		0	5.8506e-05	2.91852e-05
Others	0.418491	0.639281	0.568045		0.277907	0.374456	0.362208		0.510144	0.416348	0.381916		0.619561	0.612255	0.613654		0.102454	0.102472	0.110229		0.146925	0.199345	0.200543		0.267733	0.144729	0.155503		0.251189	0.195231	0.131858		0.180513	0.190286	0.258264		0.18797	0.208124	0.196716		0.167778	0.16534	0.147641		0.175048	0.0923518	0.15366

## Sheet: Sheet2
Sample names	Bacterial Chao1	Bacterial Shannon		Sample names	Fungal Chao1	Fungal Shannon		Sample names	Soil organic carbon (g kg-1)	CO2 release (mg C kg -1 day-1)	Soil pH
Bacterial2-4mmck1	266.111	3.7694		Fungal2-4mmck1	4486.66	6.8654		2-4mmck1	13.5975	64.35	7.93
Bacterial2-4mmck2	293	4.3349		Fungal2-4mmck2	4549.16	6.836		2-4mmck2	13.6784	68.75	7.96
Bacterial2-4mmck3	244.143	4.0688		Fungal2-4mmck3	4386.84	6.5461		2-4mmck3	13.4908	52.25	7.91
Bacrerial2-4mmleaf1	253.9	2.5306		Fungal2-4mmleaf1	4214.25	6.7698		2-4mmleaf1	14.8657	216.15	7.75
Bacrerial2-4mmleaf2	285.105	2.1548		Fungal2-4mmleaf2	4472.77	6.8175		2-4mmleaf2	14.4897	218.9	7.78
Bacrerial2-4mmleaf3	293.4	2.6136		Fungal2-4mmleaf3	4504.19	6.7249		2-4mmleaf3	14.6055	206.8	7.77
Bacrerial2-4mmstem1	291.615	2.7788		Fungal2-4mmstem1	4565.91	6.7989		2-4mmstem1	14.1225	162.25	7.86
Bacrerial2-4mmstem2	273.714	2.7359		Fungal2-4mmstem2	4252.81	6.7389		2-4mmstem2	14.2121	151.25	7.87
Bacrerial2-4mmstem3	285.731	2.806		Fungal2-4mmstem3	4697.5	6.8841		2-4mmstem3	14.5243	167.75	7.88
Bacrerial1-2mmck1	285.5	3.0472		Fungal1-2mmck1	4849.91	7		1-2mmck1	11.2021	84.7	8
Bacrerial1-2mmck2	312.25	3.2865		Fungal1-2mmck2	4868.93	6.9122		1-2mmck2	11.4633	96.25	8.03
Bacrerial1-2mmck3	317.546	3.2251		Fungal1-2mmck3	4738.19	6.9594		1-2mmck3	11.4912	87.45	8.02
Bacrerial1-2mmleaf1	325.324	2.4825		Fungal1-2mmleaf1	4620.78	6.8679		1-2mmleaf1	14.8872	281.05	7.8
Bacrerial1-2mmleaf2	290.895	2.3832		Fungal1-2mmleaf2	4474.85	6.7688		1-2mmleaf2	14.5941	283.25	7.83
Bacrerial1-2mmleaf3	326.903	2.5376		Fungal1-2mmleaf3	4808.86	6.9842		1-2mmleaf3	14.5069	280.5	7.83
Bacrerial1-2mmstem1	332.261	2.6488		Fungal1-2mmstem1	4654.06	6.812		1-2mmstem1	13.379	217.25	7.92
Bacrerial1-2mmstem2	330.528	2.9886		Fungal1-2mmstem2	4614.46	6.7835		1-2mmstem2	13.6313	203.5	7.89
Bacrerial1-2mmstem3	367.7	3.0731		Fungal1-2mmstem3	4723.84	6.873		1-2mmstem3	13.8149	200.75	7.91
Bacterial0.25-1mmck1	294	3.7655		Fungal0.25-1mmck1	4675.33	6.7428		0.25-1mmck1	7.90973	19.25	8.23
Bacterial0.25-1mmck2	316.75	3.7682		Fungal0.25-1mmck2	4732.63	6.8745		0.25-1mmck2	7.92113	30.25	8.26
Bacterial0.25-1mmck3	290.091	3.0139		Fungal0.25-1mmck3	4776.85	6.873		0.25-1mmck3	7.91772	20.35	8.27
Bacterial0.25-1mmleaf1	313.486	2.6676		Fungal0.25-1mmleaf1	4415.16	6.7339		0.25-1mmleaf1	8.40083	148.5	7.88
Bacterial0.25-1mmleaf2	300.731	2.3772		Fungal0.25-1mmleaf2	4431.01	6.7438		0.25-1mmleaf2	8.76346	151.25	7.87
Bacterial0.25-1mmleaf3	318.75	2.492		Fungal0.25-1mmleaf3	4308.88	6.6804		0.25-1mmleaf3	8.64971	146.3	7.87
Bacterial0.25-1mmstem1	322.87	2.8068		Fungal0.25-1mmstem1	4412.14	6.5764		0.25-1mmstem1	10.0571	37.4	8.03
Bacterial0.25-1mmstem2	311.222	2.7212		Fungal0.25-1mmstem2	4693.38	6.7549		0.25-1mmstem2	8.2128	12.1	8.06
Bacterial0.25-1mmstem3	316.182	2.8572		Fungal0.25-1mmstem3	4665.64	6.6194		0.25-1mmstem3	8.72187	24.75	8
Bacterial0.25mmck1	315.438	4.074		Fungal0.25mmck1	4521.05	6.9031		<0.25mmck1	16.3203	39.25	8.02
Bacterial0.25mmck2	321.5	4.0038		Fungal0.25mmck2	4548.88	6.92		<0.25mmck2	16.4303	50.25	8.03
Bacterial0.25mmck3	316.5	3.9376		Fungal0.25mmck3	4466.8	6.7798		<0.25mmck3	16.4629	40.35	8
Bacterial0.25mmleaf1	335.778	2.6106		Fungal0.25mmleaf1	4619.21	6.7941		<0.25mmleaf1	16.8697	178.5	7.71
Bacterial0.25mmleaf2	323.103	2.361		Fungal0.25mmleaf2	4473	6.6742		<0.25mmleaf2	16.5138	181.25	7.73
Bacterial0.25mmleaf3	333.5	2.3787		Fungal0.25mmleaf3	4454.9	6.7289		<0.25mmleaf3	17.2212	176.3	7.74
Bacterial0.25mmstem1	320.143	2.7143		Fungal0.25mmstem1	4725.8	6.8604		<0.25mmstem1	16.709	62.4	7.86
Bacterial0.25mmstem2	308.903	2.1891		Fungal0.25mmstem2	4591.23	6.8439		<0.25mmstem2	16.6721	37.1	7.85
Bacterial0.25mmstem3	341.391	2.4982		Fungal0.25mmstem3	4777.22	6.8446		<0.25mmstem3	16.5873	49.75	7.83
